# Supplementary material for: Electrospun NiO nanofibers as cathode materials for high performance asymmetric supercapacitors
Source: Royal Society of Chemistry journal article supplement (doi:10.1039/c4ta07075e), 2015-01-01
Supplement: c4ta07075e1.pdf [file c4ta07075e1.pdf]

## Electrospun single crystalline NiO nanofibers as cathode materials of high performance asymmetric supercapacitors

Muhamed Shareef Kolathodi, Milan Palei and Tirupattur Srinivasan Natarajan\*

Conducting Polymer Lab, Department of Physics, Indian Institute of Technology Madras, Chennai - 600036, India Fax: +91- 44 22574852; Tel: +91- 4422574860; Email: [tsn@iitm.ac.in](mailto:tsn@iitm.ac.in)

### Electronic Supplementary information

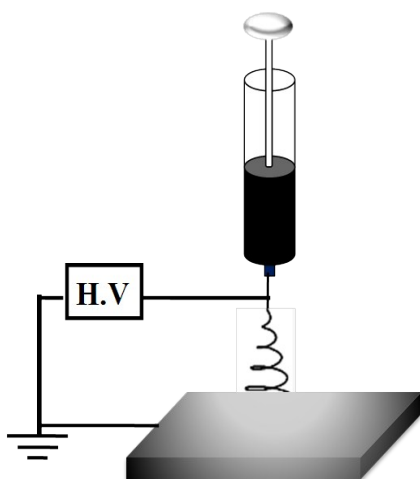

Fig S1. Schematic of electrospinning set up

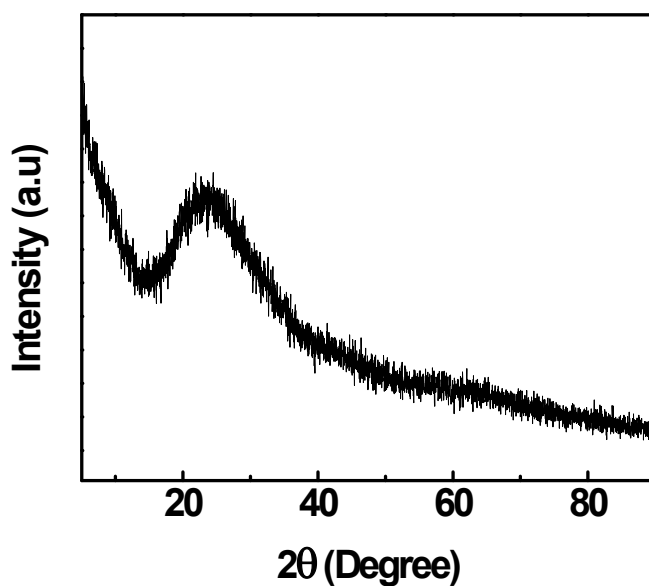

Fig. S2. XRD pattern of as-spun NiAc-PVP fibers

Table S1. Experimental details for NiAc-PVP solgel preparation

|      |         |     |       |         |
|------|---------|-----|-------|---------|
| NiAc | Ethanol | DMF | PVP   | Ethanol |
| 0.5g | 2 g     | 2 g | 0.5 g | 4 g     |

Table S2. Electrospinning parameters

|                  |                      |                        |
|------------------|----------------------|------------------------|
| Flow rate(mL/hr) | Working distance(cm) | Electric potential(kV) |
| 1                | 15                   | 20                     |

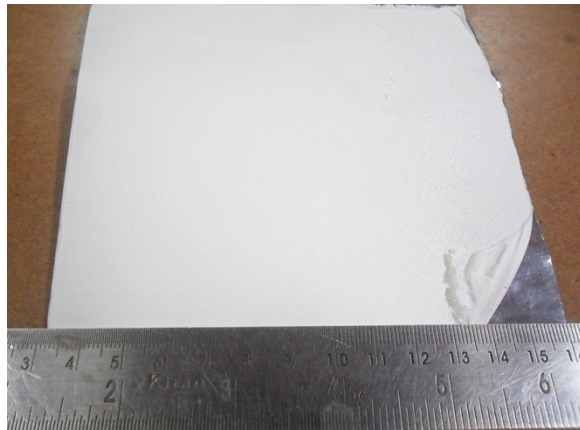

Fig. S3. Photographic image of as-spun NiAc-PVP fibrous mat

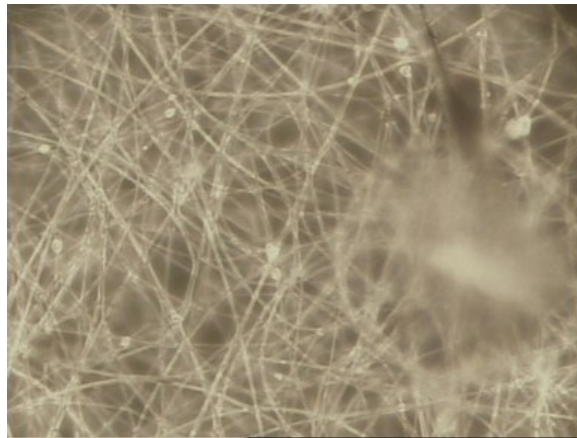

Fig. S4. Optical microscopic image of as-spun NiAc-PVP fibers

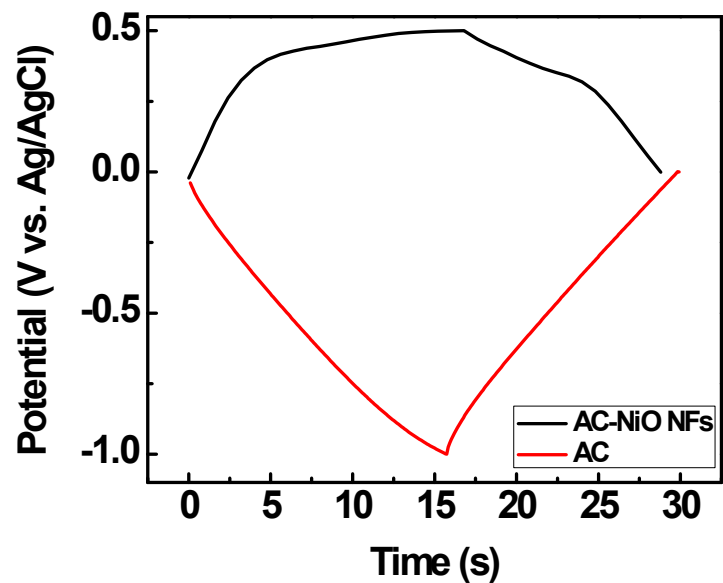

Fig. S5. Galvanostatic charging discharging curves of individual electrodes (AC and NiO NF-AC composite) plotted against Ag/AgCl electrode at a current density of 5 A/g

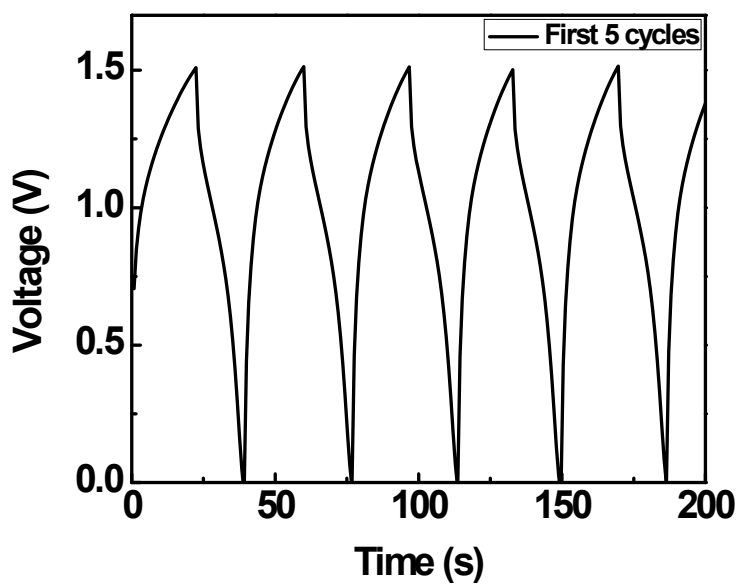

Fig. S6. First 5 cycles of 5000 galvanostatic charging discharging cycles performed at a current density of 10 A/g.
